# Supplementary material for: Synthesis and characterization of π-conjugated copolymers with thieno-imidazole units in the main chain: application for bulk heterojunction polymer solar cells
Source: Royal Society of Chemistry journal article supplement (doi:10.1039/c5cp00017c), 2015-01-01
Supplement: c5cp00017c1.pdf [file c5cp00017c1.pdf]

## Supporting information

### Synthesis, characterization and photovoltaic properties of $\pi$ -conjugated copolymers with thieno-imidazole units in main chain

M. L. Keshtov<sup>a\*</sup>, S. A. Kuklin<sup>a</sup>, D. Yu. Godovsky<sup>a</sup>, F.Ch. Chen<sup>d</sup> A. R. Khokhlov<sup>a,b</sup>, S.A. Siddiqui<sup>c</sup>, and G. D Sharma<sup>c\*</sup>,

<sup>a</sup>Institute of Organoelement Compounds of the Russian Academy of Sciences, Vavilova st., 28, 119991 Moscow, Russian Federation. E-mail: keshtov@ineos.ac.ru

<sup>b</sup>Lomonosov Moscow State University, Faculty of Physics, 1-2 Leninskiye Gory, Moscow, 119991, Russian Federation

<sup>c</sup>R & D Center for Engineering and Science, JEC group of Colleges, Jaipur Engineering College, Kukas, Jaipur 303101, India. E-mail: [sharamgd\\_in@yahoo.com](mailto:sharamgd_in@yahoo.com); [gdsharma273@gmail.com](mailto:gdsharma273@gmail.com); Fax: +91-1426-511240;

Tel: +91-1426-227345

<sup>d</sup>Department of Photonics, National Chiao Tung University, Hsinchu, Taiwan 300, Republic of China E-mail: [fcchen64@hotmail.com](mailto:fcchen64@hotmail.com)

### Synthesis of copolymers

**2, 7 –dibromobenzo[2,1-b;4,5-b']dithiophene -4,5-dione (1):** synthesized according to the method, analogous to reported in literature [1]. Dark violet crystals with yield is 0.47 g (92 %).  $T_{melt} = 235-238^\circ \text{C}$ . NMR -<sup>1</sup>H(CDCl<sub>3</sub>, 400 MHz,  $\delta$ , ppm): 7.25 (c, 2H). Found. % C 31.60; H 0.50; Br 42.15; for C<sub>10</sub>H<sub>2</sub>Br<sub>2</sub>O<sub>2</sub>S<sub>2</sub>, calculated, % C 31.77, H 0.53; Br 42.27.

**4-(2-ethylhexyloxy)benzaldehyde (2):** Synthesized according to the method [2]. Yield 11.7 g (87 %),  $T_{boil} = 190-193^\circ \text{C}$  (2 mm Hg), NMR-<sup>1</sup>H(CDCl<sub>3</sub>, 400 MHz,  $\delta$ , ppm): 9.86 (c, 1H), 7.81 (d, J=8.7 Hz, 2H), 6.98 ((d, J=8.7 Hz, 2H), 3.91 (d, J=5.8 Hz, 2H), 1.74 (m, 1H), 1.54-1.28 (m, 8H), 0.99-0.82 (m, 6H). Found, % C 76.47, H 9.37, for C<sub>15</sub>H<sub>22</sub>O<sub>2</sub>, calculated 76.88; H 9.46.

**5-(2-ethylhexyl)thiophene-2-carboxyaldehyde (3).** Synthesized according to method [3][ Yield 7.8 g (63 %).  $T_{boil} = 142-145^\circ \text{C}$  (2 mm.Hg.). NMR-<sup>1</sup>H (CDCl<sub>3</sub>, 400 MHz,  $\delta$ , ppm): 9.80 (c, 1H), 7.59 (d, J = 3.7 Hz, 1H), 6.87 (d, J = 3.7 Hz, 1H), 2.79 (d, J = 6.8 Hz, 2H), 1.66-

1.55 (m, 1H), 1.37-1.20 (m, 8H), 0.87 (t, J = 7.4 Hz, 6H). Found, %: C 69.27; H 8.86; S 14.01. For C<sub>13</sub>H<sub>20</sub>OS calculated, %: C 69.59; H 8.98; S 14.29.

**5,8-dibromo-2-{4-[(2ethylhexyl)oxy]phenyl}-1H-bisthieno[3,2-e:2',3'-g] benzimidazole (5).** Into three neck flask with the volume of 25 ml, reversible refrigerator, input for argon and magnetic mixer placed 0.5 g (1.32 mmol) 2,7-dibromobenzo[2,1-b;4,5-b']dithiophen-4,5-dion (1), 0.31 g (1.32 mmol) 4-(2-ethylhexyloxy)benzaldehyde (2), 1.02 g (13.22 mmol) ammonium acetate and 10 g of ice acetic acid, thereafter the mixture was stirred at boiling in the flow of Argon during 7 hours. Reaction mass was cooled down to room temperature and casted into 100 ml of distilled water, product was extracted by chloroform. Extract was washed by saturated water solution of NaCl, dried by MgSO<sub>4</sub> and steamed using rotor evaporator. Product was purified by column chromatography (silicagel, eluent – hexane/ethylacetate=1:1). Obtained beige crystals. Yield 0.58 g (74%) T<sub>melt</sub> = 202-204 °C. NMR<sup>1</sup>H (CDCl<sub>3</sub>, 400 MHz, δ, ppm.): 8.07 (d, J = 8.7 Hz, 2H), 7.78 (c, 2H), 7.05 (d, J = 8.7 Hz, 2H), 3.97 (d, J = 5.6 Hz, 2H), 2.05 (m, 1H), 1.76 (m, 1H), 1.60-1.33 (m, 8H), 0.98-0.89 (m, 6H). NMR-<sup>13</sup>C (CDCl<sub>3</sub>, 100 MHz, δ, ppm.): 160.79, 149.84, 148.21, 128.77, 127.67, 123.70, 123.17, 121.51, 114.89, 113.03, 70.58, 39.18, 30.34, 28.96, 23.68, 22.94, 14.00, 11.01. Found, %: C 50.49; H 4.00; N 4.58; Br 26.84. For C<sub>25</sub>H<sub>24</sub>Br<sub>2</sub>N<sub>2</sub>S<sub>2</sub>O calculated, %: C 50.68; H 4.08; N 4.73, Br 26.98.

**5,8-dibromo-2-[5-(2ethylhexyl)thiophen-2-yl]-1H-bisthieno[3,2-e:2',3'-g] benzimidazole (M<sub>2</sub>).** Synthesized analogous to compound 5. Yellow crystals. Yield 0.49 g (75 %). T<sub>melt</sub> = 194-195 °C. NMR-<sup>1</sup>H ((CD<sub>3</sub>)<sub>2</sub>CO, 400 MHz, δ, ppm.): 9.85 (c, 1H), 7.79 (c, 2H), 7.56 (d, J = 3.6 Hz, 1H), 6.89 (d, J = 3.5 Hz, 1H), 2.84 (d, J = 6.6 Hz, 2H), 1.66 (m, 1H), 1.45 – 1.23 (m, 8H), 0.97 – 0.83 (m, 6H). NMR-<sup>13</sup>C ((CD<sub>3</sub>)<sub>2</sub>CO, 100 MHz, δ, ppm.): 148.08, 146.50, 132.21, 128.80, 127.31, 126.82, 125.47, 113.26, 112.96, 112.69, 42.41, 34.69, 33.21, 29.65, 26.33, 23.75, 14.48, 11.23. Found, %: C 47.18; H 3.64; N 4.48; Br 27.14. For C<sub>23</sub>H<sub>22</sub>Br<sub>2</sub>N<sub>2</sub>S<sub>3</sub> calculated, %: C, 47.43; H, 3.81; N, 4.81 ; Br, 27.44.

**5,8-dibromo-2-[1',1',2',2',3',3',4',4'-octafluorobutyl]-1H-bisthieno[3,2-e:2',3'-g] benzimidazole (M<sub>3</sub>).** Synthesized analogous to compound 5. Yield (67 %). NMR-<sup>1</sup>H ((CD<sub>3</sub>)<sub>2</sub>CO, 400 MHz, δ, ppm.): 13.36.85 (s, 1H), 7.87 (s, 1H), 7.83 (s, 1H), 6.91 (t, 1H). NMR <sup>19</sup>F ((CD<sub>3</sub>)<sub>2</sub>CO, 100 MHz, δ, ppm.): -111.35, -124.32, -130.05, -139.03 ppm. Found, %:

C 30.21; H 0.64; N 4.48; Br 26.84. For  $C_{15}H_4Br_2N_2F_8S_2$  calculated, %: C, 30.63; H, 0.68; N, 4.76; Br, 27.17.

**5,8-Dibromo-2-(4-((2-ethylhexyl)oxy)phenyl)-1-octyl-1H-dithieno[2',3':3,4;3'', 2'':5,6] benzo[1,2-d]imidazole (M<sub>1</sub>) [4].** To a solution of **5** ( g, 9.31 mmol) in DMF (50 mL),  $K_2CO_3$  (3.08 g, 22.34 mmol) was added and heated to 95 °C for 2 hours. Then cooled to room temperature. To it 1-iodooctane ( g, 12.19 mmol) was added slowly. Reaction mixture was heated to 95°C overnight. After cooling to room temperature the reaction mixture was poured in water (300mL). Organic phase was extracted by ethyl acetate via repeated washing in water. Dried over  $MgSO_4$ , solvent was removed under rotary evaporation. Crude product was purified by silica gel column chromatography (Hexane as eluent) to give a brown solid ( g, 88%). <sup>1</sup>H NMR ( $CDCl_3$ , 400 MHz): 8.00 (s, 1H), 7.62 (d, 2H), 7.59 (s, 1H), 7.06 (d, 2H, 8.7Hz), 4.42 (t, 2H, 7.8 Hz), 3.95 (d, 2H, 5.7 Hz), 1.55-0.85 (m, 30H). Calcd for  $C_{33}H_{40}Br_2N_2OS_2$ : C, 56.25; H, 5.72; N, 3.98; Found: C, 55.99; H, 5.45; N, 3.56.

**Synthesis of polymer P1.** Into three neck flask with the volume of 25 ml, connected to inverse refrigerator and magnetic mixer placed in the flow of 0.2940(0.5mmol) 5,8-dibromo-2-[1',1',2',2',3',3',4',4'-octafluorobutyl]-1H-bisthieno[3,2-e:2',3'-g] benzimidazole (M<sub>3</sub>). 0.3102g (0.5 mmol) 4,7-bisc[5-(trimethylsilyl)thiophen-2il]2,1,3-benzothiadiazol 0.027 g  $Pd(Ph_3P)_4$ , added 20 ml of dry toluene. Reaction mixture was stirred at 110 °C during 48 h in argon, thereafter 0.02 g of 2-bromothiophene was added and 0.02 g of 2-(tributylstannil)thiophene added and continued stirring during 5 hours. Then the mixture was cooled down to room temperature, product was precipitated in 200 ml of methanol and filtered. Polymer was then dissolved in chloroform and re-precipitated in methanol, afterwards it was purified by extraction by methanol, hexane and chloroform in Soxhlet apparatus and dried in vacuum. Yield 75%. Calc. for  $C_{29}H_{10}N_4S_5F_8$ , %: C, 47.93; H, 1.39; N, 7.71; S, 22.06; F, 20.91 Found: C, 47.98; H, 1.27; N, 7.64; S, 22.36; F, 20.41. <sup>1</sup>H NMR (400 MHz,  $CDCl_3$ ,  $\delta$ , ppm): 7.74-7.30 (6H, Ar), 7.10-6.89 (2H, alk).

**Copolymer P2:** **P2** was synthesized analogous to **P1**. Yield 81%. Calc. for  $C_{37}H_{28}N_4S_6$ , %: C, 61.63; H, 3.91; N, 7.77; S, 26.68. Found: C, 61.91; H, 3.83; N, 7.54; S, 26.38. <sup>1</sup>H NMR (400 MHz,  $CDCl_3$ ,  $\delta$ , ppm): 8.25-7.50 (10H, Ar), 3.75(2H, aliph), 2.50-0.55 (15H, alk).

**Copolymer P3:** **P3** was synthesized analogous to **P1**. Yield 87 %. Calc. for  $C_{47}H_{46}N_4S_5O_1$ , %: C, 66.95; H, 5.50; N, 6.64; S, 19.01. Found: C, 67.05; H, 5.47; N, 6.40; S, 18.81. <sup>1</sup>H NMR (400 MHz,  $CDCl_3$ ,  $\delta$ , ppm): 7.80-7.50(12H, Ar), 3.90-0.55(34H, alk).

## References

1. J. Hou, H.Y. Chen, S. Zhang, G. Li, Y. Yang, *J. Am. Chem. Soc.* 2008, 130 16144-16145
2. B.C. Popere, A.M. Della Pelle, S. Thayumanavan, *Macromolecules* 2011, 44, 4767-4776
3. Zheng C., Pu S., Xu J., Luo M., Huang D., Shen L., *Tetrahedron*. 2007, 63, 5437-5449.
4. R. Satapathy , Y.H. Wu , and H.Ch. Lin *Org. Lett.*, 2012, 14 (10), pp 2564–2567

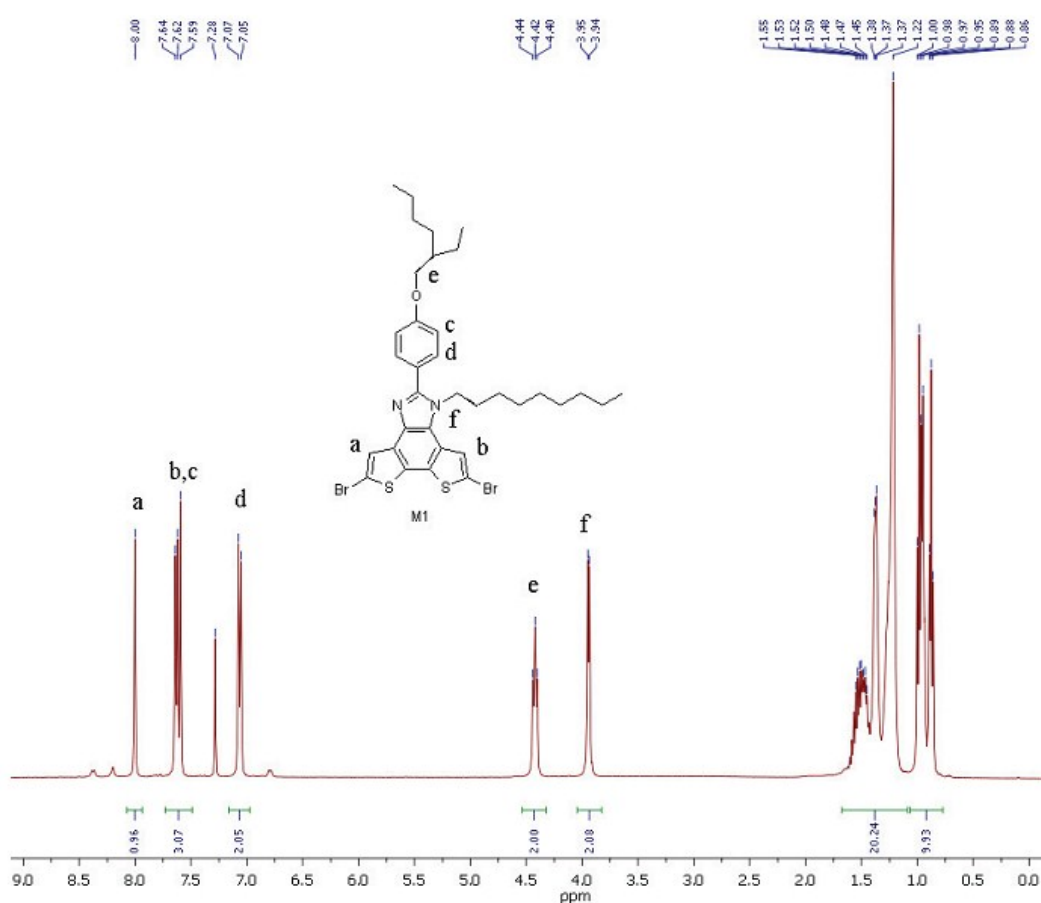

Figure S1. <sup>1</sup>H NMR spectra of monomer **M1** in CDCl<sub>3</sub>

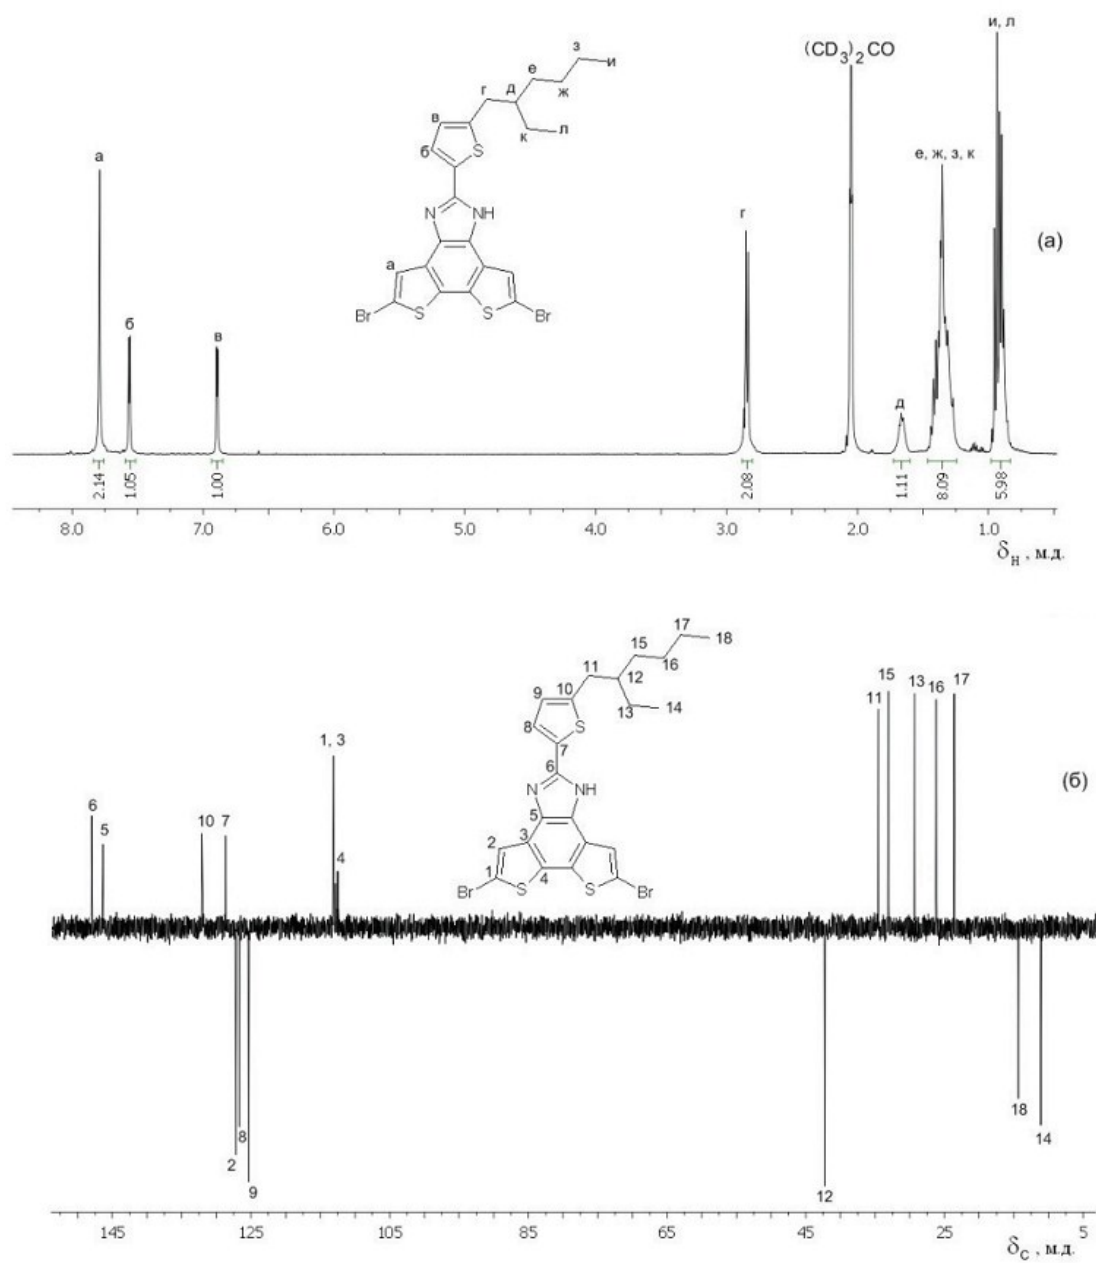

Figure S2 (a)  $^1\text{H}$  NMR spectra (b)  $^{13}\text{C}$  NMR of **M2** in  $\text{CDCl}_3$

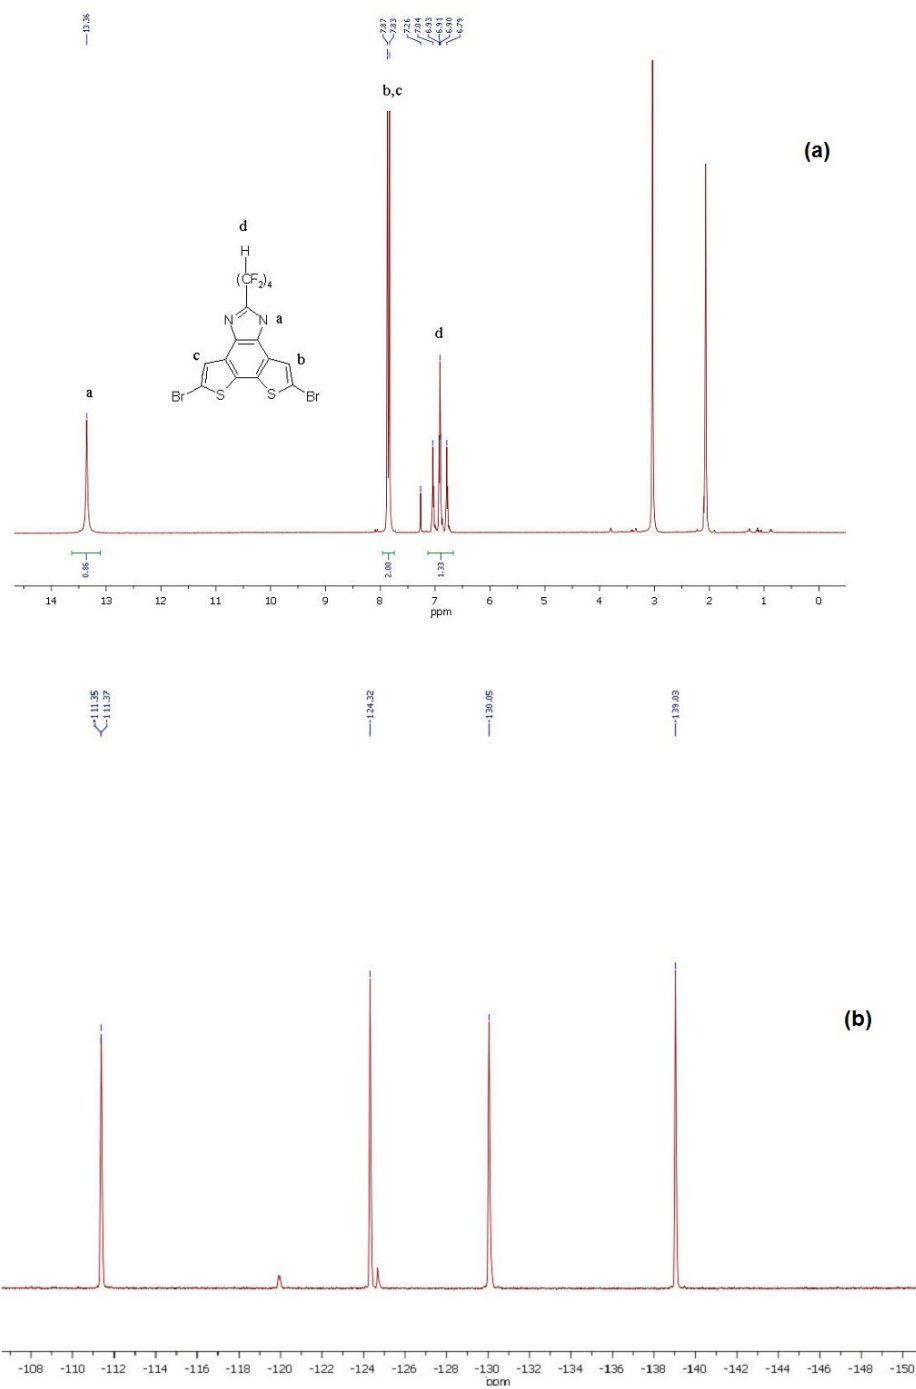

Figure S3. (a)  $^1\text{H}$  NMR spectra of **M3** in acetone- $d_6$  and (b)  $^{19}\text{F}$  NMR spectra of **M3**

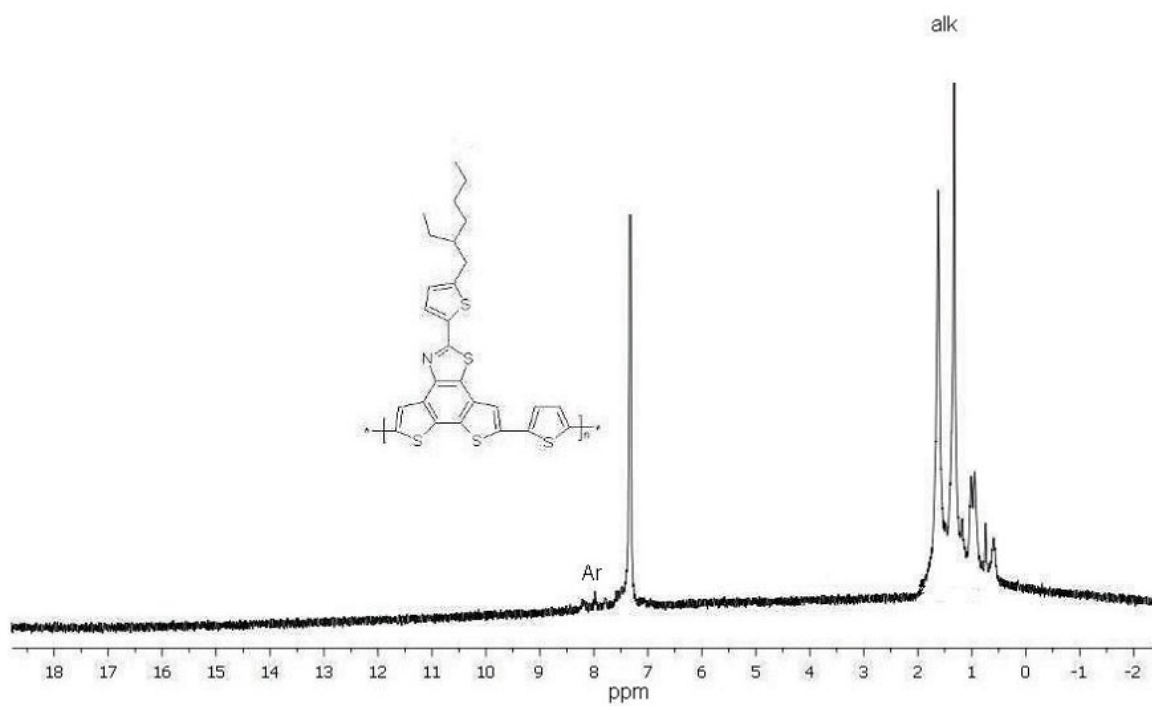

Figure S4.  $^1\text{H}$  NMR spectra of copolymer **SB24**
